# Supplementary material
Source: PubMed Central journal article supplement (PMC1630740)
Supplement: plntphys_pp.106.087817_1.pdf [file plntphys_pp.106.087817_1.pdf]

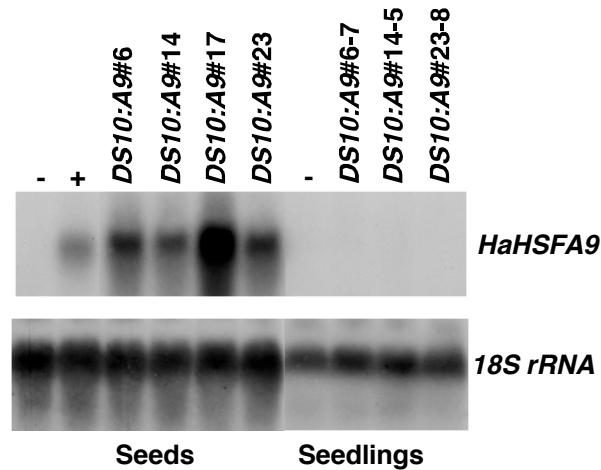

**Figure S1.** Seed-specific overexpression of *HaHSFA9* mRNAs from the *DS10* promoter in transgenic tobacco. We depict northern hybridization analyses of total RNA from seed samples from the indicated heterozygous  $T_0$  lines. Also shown, similar analyses for 21 dpi seedling samples from the corresponding homozygous daughter lines. Total RNA amount per lane was  $15\mu\text{g}$ . Hybridization controls: (-) RNA from non-transgenic tobacco seeds; (+) RNA from sunflower embryos (21 days post-anthesis). Labeled DNA probes are indicated to the right of the autoradiographs. The *HaHSFA9* probe was prepared by labeling an *Xba*I fragment (1287 bp) from plasmid p35:HSFA9 (Almoguera et al., 2002, cited in the manuscript). The fragment used for the *18S rRNA* probe was described by Almoguera and Jordano (Plant Mol Biol 19: 781-92, 1992). DNA fragments were labeled using the Megaprime DNA Labelling System from Amersham Biosciences and following directions from the manufacturer. Hybridizations were performed overnight at  $65^\circ\text{C}$  in the modified Church and Gilbert buffer (Proc Natl Acad Sci U S A, 81: 1991-5 [1984], 7% [w/v] SDS, 0.5 M  $\text{NaHPO}_4$  [pH 7.2], 10 mM EDTA).
