# Supplementary material
Source: PubMed Central journal article supplement (PMC1630740)
Supplement: plntphys_pp.106.087817_2.pdf [file plntphys_pp.106.087817_2.pdf]

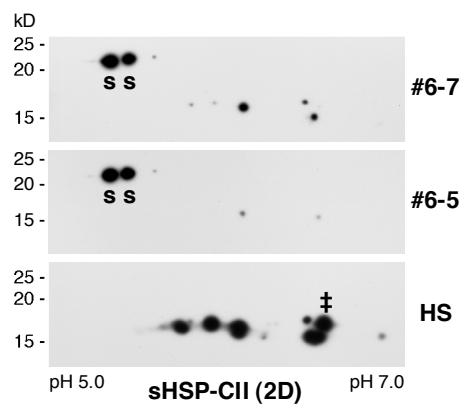

**Figure S2.** 2D-western analyses using CII sHSP antibodies. The same seed and seedling samples as in Fig. 1B were analyzed. The different labels indicate: (‡) heat-stress specific polypeptide not detectable in transgenic seeds and (s), seed-specific polypeptides. The total amount of protein, the molecular mass standards, and the pH range (for IEF), are as in Fig. 1B.
