# Supplementary material
Source: PubMed Central journal article supplement (PMC1630740)
Supplement: plntphys_pp.106.087817_3.pdf [file plntphys_pp.106.087817_3.pdf]

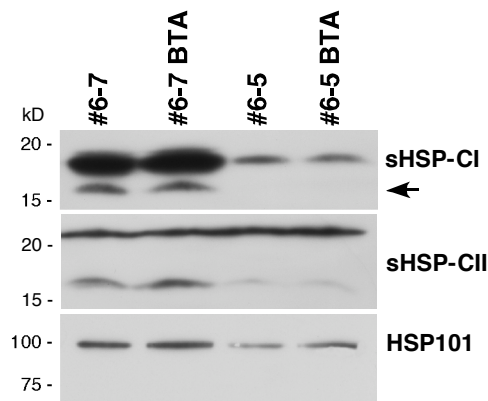

**Figure S3.** Persistence of higher HSP accumulation after the 50°C treatment used in the basal thermotolerance assays and lack of response to heat in the imbibed *DS10:A9* seeds. Protein samples from seeds were analyzed after 1D-electrophoresis. Samples prepared before and after the basal thermotolerance assay (BTA) from sibling homozygous lines with (#6-7) or without (#6-5) the transgene are presented. The rest of the symbols are as in Fig. 1A.
