# Supplementary material
Source: PubMed Central journal article supplement (PMC1630740)
Supplement: plntphys_pp.106.087817_4.pdf [file plntphys_pp.106.087817_4.pdf]

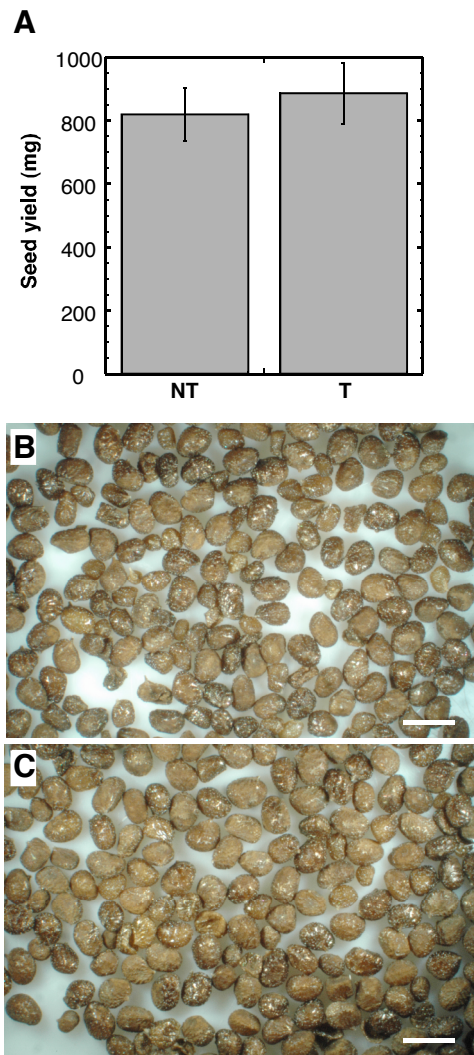

**Figure S4.** The seed yield and seed morphology was unaltered in the *DS10:A9* lines. (A) Average total seed yield for ten homozygous transgenic lines (T), and a comparison with their non-transgenic siblings (NT). Pictures of representative seeds from the #6-5 (B) and #6-7 (C) lines. Scale bars, 1mm. Differences in total seed yield between transgenic and non-transgenic sibling plants were not significant ( $F = 0.204$ ,  $P = 0.66$ , 1 and 14 df).
